# Supplementary material
Source: HighWire-hosted journal article supplement (https://www.ajevonline.org/highwire/filestream/1917/field_highwire_adjunct_files/0/13-115_206_SuppData.pdf)
Supplement: 13-115_206_SuppData.pdf [file 13-115_206_SuppData.pdf]

## Supplemental Data for:

Giacosa, S., F. Torchio, S. Río Segade, M. Giust, D. Tomasi, V. Gerbi, and L. Rolle. 2014.

Selection of a mechanical property for flesh firmness of table grapes in accordance with OIV ampelographic descriptor.

Am. J. Enol. Vitic. 65:206-214. doi: 10.5344/ajev.2014.13115.

**Supplemental Table 1** Peeled berry texture profile analysis (TPA) parameters normalized by berry volume of densimetrically sorted berries at harvest.

| Parameter normalized by berry volume    | Density class <sup>a</sup> | Cultivar (OIV 235 descriptor group) <sup>b,c</sup> |                   |                         |                       |                 | Signf <sup>d</sup> |
|-----------------------------------------|----------------------------|----------------------------------------------------|-------------------|-------------------------|-----------------------|-----------------|--------------------|
|                                         |                            | Perle von Csaba (1)                                | Italia (2)        | Dattier de Beyrouth (2) | Superior Seedless (3) | Sultanina (3)   |                    |
| Berry hardness (N/cm <sup>3</sup> )     | A                          | 1.460 ± 0.714a,β                                   | 0.720 ± 0.214ab,α | 1.051 ± 0.356ab,αβ      | 2.118 ± 0.785b,γ      | 2.837 ± 1.041δ  | ***                |
|                                         | B                          | 1.415 ± 0.552a,β                                   | 0.938 ± 0.239b,α  | 0.919 ± 0.283a,α        | 1.784 ± 0.567ab,β     | 2.757 ± 0.997γ  | ***                |
|                                         | C                          | 2.169 ± 0.841b,γδ                                  | 0.651 ± 0.084a,α  | 1.133 ± 0.366b,αβ       | 1.653 ± 0.525a,βγ     | 2.508 ± 0.772δ  | ***                |
|                                         | Signf <sup>d</sup>         | **                                                 | **                | *                       | *                     | ns              |                    |
| Berry cohesiveness (1/cm <sup>3</sup> ) | A                          | 0.453 ± 0.249γ                                     | 0.113 ± 0.068α    | 0.277 ± 0.134β          | 0.107 ± 0.035a,α      | 0.365 ± 0.100βγ | ***                |
|                                         | B                          | 0.460 ± 0.242β                                     | 0.181 ± 0.080α    | 0.208 ± 0.082α          | 0.115 ± 0.043a,α      | 0.412 ± 0.176β  | ***                |
|                                         | C                          | 0.529 ± 0.226γ                                     | 0.110 ± 0.027α    | 0.276 ± 0.168αβ         | 0.157 ± 0.088b,α      | 0.397 ± 0.122βγ | ***                |
|                                         | Signf <sup>d</sup>         | ns                                                 | ns                | ns                      | **                    | ns              |                    |
| Berry gumminess (N/cm <sup>3</sup> )    | A                          | 0.459 ± 0.222a,αβ                                  | 0.294 ± 0.121α    | 0.519 ± 0.214β          | 0.839 ± 0.336γ        | 1.182 ± 0.413δ  | ***                |
|                                         | B                          | 0.449 ± 0.160a,α                                   | 0.405 ± 0.121α    | 0.455 ± 0.157α          | 0.711 ± 0.239β        | 1.129 ± 0.496γ  | ***                |
|                                         | C                          | 0.647 ± 0.247b,β                                   | 0.283 ± 0.035α    | 0.575 ± 0.228β          | 0.687 ± 0.191β        | 1.062 ± 0.390γ  | ***                |
|                                         | Signf <sup>d</sup>         | **                                                 | ns                | ns                      | ns                    | ns              |                    |
| Berry springiness (mm/cm <sup>3</sup> ) | A                          | 1.474 ± 0.503γ                                     | 0.589 ± 0.223α    | 1.108 ± 0.334ab,β       | 0.720 ± 0.140α        | 1.508 ± 0.199γ  | ***                |
|                                         | B                          | 1.446 ± 0.481γ                                     | 0.838 ± 0.261αβ   | 0.930 ± 0.225a,β        | 0.705 ± 0.137α        | 1.567 ± 0.377γ  | ***                |
|                                         | C                          | 1.700 ± 0.436γ                                     | 0.601 ± 0.096α    | 1.127 ± 0.370b,β        | 0.808 ± 0.219αβ       | 1.571 ± 0.243γ  | ***                |
|                                         | Signf <sup>d</sup>         | ns                                                 | ns                | *                       | ns                    | ns              |                    |
| Berry chewiness (MJ/cm <sup>3</sup> )   | A                          | 0.504 ± 0.203a,α                                   | 0.648 ± 0.221α    | 1.060 ± 0.439β          | 2.304 ± 0.887b,γ      | 2.126 ± 0.813γ  | ***                |
|                                         | B                          | 0.496 ± 0.193a,α                                   | 0.830 ± 0.242β    | 1.037 ± 0.365β          | 1.815 ± 0.608a,γ      | 1.812 ± 0.789γ  | ***                |
|                                         | C                          | 0.652 ± 0.258b,α                                   | 0.679 ± 0.026α    | 1.234 ± 0.393αβ         | 1.634 ± 0.456a,βγ     | 1.836 ± 0.769γ  | ***                |
|                                         | Signf <sup>d</sup>         | *                                                  | ns                | ns                      | ***                   | ns              |                    |
| Berry resilience (1/cm <sup>3</sup> )   | A                          | 0.202 ± 0.103γ                                     | 0.049 ± 0.029α    | 0.121 ± 0.056β          | 0.057 ± 0.019a,α      | 0.190 ± 0.057γ  | ***                |
|                                         | B                          | 0.205 ± 0.105β                                     | 0.081 ± 0.039α    | 0.092 ± 0.036α          | 0.061 ± 0.025a,α      | 0.208 ± 0.090β  | ***                |
|                                         | C                          | 0.249 ± 0.108β                                     | 0.048 ± 0.012α    | 0.124 ± 0.075α          | 0.083 ± 0.048b,α      | 0.210 ± 0.063β  | ***                |
|                                         | Signf <sup>d</sup>         | ns                                                 | ns                | ns                      | **                    | ns              |                    |

<sup>a</sup>Density class: A, 1075 kg/m<sup>3</sup>; B, 1081 kg/m<sup>3</sup>; C, 1088 kg/m<sup>3</sup>.

<sup>b</sup>All data are expressed as average value ± standard deviation (n = 30). Different Latin letters within the same column indicate significant differences among the three density classes in the same grape cultivar (Tukey b test; *p* < 0.05). Different Greek letters within the same row indicate significant differences among grape cultivars at the same density class (Tukey b test; *p* < 0.05).

<sup>c</sup>OIV 235 descriptor code of flesh firmness (1, soft; 2, slightly firm; 3, very firm).

<sup>d</sup>\*, \*\*, \*\*\*, and ns indicate significance at *p* < 0.05, 0.01, 0.001, and not significant, respectively.

## Supplemental Data for:

Giacosa, S., F. Torchio, S. Río Segade, M. Giust, D. Tomasi, V. Gerbi, and L. Rolle. 2014.

Selection of a mechanical property for flesh firmness of table grapes in accordance with OIV ampelographic descriptor.

Am. J. Enol. Vitic. 65:206-214. doi: 10.5344/ajev.2014.13115.

**Supplemental Table 2** Peeled berry cutting parameters normalized by berry diameter of densimetrically sorted berries at harvest.

| Parameter normalized by berry diameter | Density class <sup>a</sup> | Cultivar (OIV 235 descriptor group) <sup>b,c</sup> |                                    |                                         |                             |                             | Signf <sup>d</sup> |
|----------------------------------------|----------------------------|----------------------------------------------------|------------------------------------|-----------------------------------------|-----------------------------|-----------------------------|--------------------|
|                                        |                            | Perle von Csaba (1)                                | Italia (2)                         | Dattier de Beyrouth (2)                 | Superior Seedless (3)       | Sultanina (3)               |                    |
| F <sub>1</sub> (N/mm)                  | A                          | 0.103 ± 0.044 $\alpha$                             | 0.105 ± 0.041 $\alpha$             | 0.144 ± 0.048 $\alpha$                  | 0.258 ± 0.109 $\beta$       | 0.132 ± 0.039 $\alpha$      | ***                |
|                                        | B                          | 0.118 ± 0.050 $\alpha$                             | 0.111 ± 0.033 $\alpha$             | 0.155 ± 0.046 $\alpha$                  | 0.233 ± 0.113 $\beta$       | 0.119 ± 0.031 $\alpha$      | ***                |
|                                        | C                          | 0.107 ± 0.050 $\alpha$                             | 0.126 ± 0.032 $\alpha\beta$        | 0.170 ± 0.048 $\beta$                   | 0.232 ± 0.087 $\gamma$      | 0.141 ± 0.043 $\alpha\beta$ | ***                |
|                                        | Signf <sup>d</sup>         | ns                                                 | ns                                 | ns                                      | ns                          | ns                          |                    |
| W <sub>1</sub> (N)                     | A                          | 0.249 ± 0.146 $\alpha$                             | 0.277 ± 0.225 $\alpha$             | 0.365 ± 0.227 $\alpha$                  | 0.833 ± 0.640 $\beta$       | 0.221 ± 0.127 $\alpha$      | ***                |
|                                        | B                          | 0.281 ± 0.164 $\alpha$                             | 0.249 ± 0.150 $\alpha$             | 0.435 ± 0.224 $\alpha\beta$             | 0.696 ± 0.775 $\beta$       | 0.191 ± 0.104 $\alpha$      | **                 |
|                                        | C                          | 0.206 ± 0.124 $\alpha$                             | 0.346 ± 0.159 $\alpha\beta$        | 0.434 ± 0.203 $\alpha\beta$             | 0.594 ± 0.472 $\beta$       | 0.286 ± 0.212 $\alpha$      | ***                |
|                                        | Signf <sup>d</sup>         | ns                                                 | ns                                 | ns                                      | ns                          | ns                          |                    |
| E <sub>1</sub> (N/mm <sup>2</sup> )    | A                          | 0.020 ± 0.006 $\alpha,\alpha\beta$                 | 0.018 ± 0.003 $\alpha,\alpha$      | 0.025 ± 0.005 $\beta$                   | 0.042 ± 0.011 $\gamma$      | 0.039 ± 0.010 $\gamma$      | ***                |
|                                        | B                          | 0.024 ± 0.007 $\alpha,\alpha$                      | 0.022 ± 0.005 $\beta,\alpha$       | 0.024 ± 0.006 $\alpha$                  | 0.043 ± 0.009 $\gamma$      | 0.037 ± 0.005 $\beta$       | ***                |
|                                        | C                          | 0.037 ± 0.018 $\beta,\beta$                        | 0.021 ± 0.003 $\alpha\beta,\alpha$ | 0.027 ± 0.007 $\alpha$                  | 0.045 ± 0.008 $\gamma$      | 0.038 ± 0.008 $\beta$       | ***                |
|                                        | Signf <sup>d</sup>         | ***                                                | **                                 | ns                                      | ns                          | ns                          |                    |
| F <sub>2</sub> (N/mm)                  | A                          | 0.148 ± 0.103 $\beta$                              | 0.190 ± 0.042 $\alpha\beta,\beta$  | 0.143 ± 0.045 $\alpha,\beta$            | 0.173 ± 0.110 $\beta$       | 0.090 ± 0.045 $\alpha$      | ***                |
|                                        | B                          | 0.151 ± 0.141 $\beta$                              | 0.205 ± 0.068 $\beta,\beta$        | 0.167 ± 0.046 $\alpha\beta,\beta$       | 0.166 ± 0.086 $\beta$       | 0.077 ± 0.031 $\alpha$      | ***                |
|                                        | C                          | 0.124 ± 0.049 $\alpha\beta$                        | 0.151 ± 0.045 $\alpha,\beta$       | 0.172 ± 0.040 $\beta,\beta$             | 0.158 ± 0.088 $\beta$       | 0.080 ± 0.036 $\alpha$      | ***                |
|                                        | Signf <sup>d</sup>         | ns                                                 | *                                  | *                                       | ns                          | ns                          |                    |
| E <sub>2</sub> (N/mm <sup>2</sup> )    | A                          | 0.015 ± 0.009 $\beta$                              | 0.011 ± 0.002 $\alpha,\alpha$      | 0.010 ± 0.003 $\alpha,\alpha$           | 0.011 ± 0.008 $\alpha$      | 0.008 ± 0.004 $\alpha$      | ***                |
|                                        | B                          | 0.017 ± 0.013 $\gamma$                             | 0.014 ± 0.004 $\beta,\beta\gamma$  | 0.012 ± 0.004 $\alpha\beta,\alpha\beta$ | 0.011 ± 0.006 $\alpha\beta$ | 0.007 ± 0.004 $\alpha$      | ***                |
|                                        | C                          | 0.024 ± 0.012 $\beta$                              | 0.010 ± 0.003 $\alpha,\alpha$      | 0.013 ± 0.003 $\beta,\alpha$            | 0.011 ± 0.009 $\alpha$      | 0.007 ± 0.003 $\alpha$      | ***                |
|                                        | Signf <sup>d</sup>         | ns                                                 | ***                                | *                                       | ns                          | ns                          |                    |
| F <sub>max</sub> (N/mm)                | A                          | 0.147 ± 0.088 $\alpha$                             | 0.224 ± 0.052 $\beta$              | 0.191 ± 0.045 $\alpha,\alpha\beta$      | 0.301 ± 0.113 $\gamma$      | 0.145 ± 0.056 $\alpha$      | ***                |
|                                        | B                          | 0.144 ± 0.054 $\alpha$                             | 0.226 ± 0.056 $\beta$              | 0.192 ± 0.041 $\alpha,\alpha\beta$      | 0.285 ± 0.109 $\gamma$      | 0.138 ± 0.029 $\alpha$      | ***                |
|                                        | C                          | 0.134 ± 0.055 $\alpha$                             | 0.187 ± 0.047 $\beta\gamma$        | 0.221 ± 0.040 $\beta,\gamma$            | 0.273 ± 0.076 $\delta$      | 0.148 ± 0.042 $\alpha\beta$ | ***                |
|                                        | Signf <sup>d</sup>         | ns                                                 | ns                                 | *                                       | ns                          | ns                          |                    |
| E <sub>max</sub> (N/mm <sup>2</sup> )  | A                          | 0.021 ± 0.010 $\alpha$                             | 0.017 ± 0.004 $\alpha,\alpha$      | 0.021 ± 0.006 $\alpha\beta,\alpha$      | 0.033 ± 0.013 $\beta$       | 0.032 ± 0.013 $\beta$       | ***                |
|                                        | B                          | 0.022 ± 0.011 $\alpha\beta$                        | 0.022 ± 0.007 $\beta,\alpha\beta$  | 0.019 ± 0.006 $\alpha,\alpha$           | 0.029 ± 0.011 $\beta$       | 0.028 ± 0.009 $\beta$       | ***                |
|                                        | C                          | 0.030 ± 0.016 $\beta$                              | 0.016 ± 0.005 $\alpha,\alpha$      | 0.025 ± 0.008 $\beta,\alpha\beta$       | 0.034 ± 0.012 $\beta$       | 0.033 ± 0.011 $\beta$       | ***                |
|                                        | Signf <sup>d</sup>         | ns                                                 | *                                  | *                                       | ns                          | ns                          |                    |

<sup>a</sup>Density class: A, 1075 kg/m<sup>3</sup>; B, 1081 kg/m<sup>3</sup>; C, 1088 kg/m<sup>3</sup>.

<sup>b</sup>All data are expressed as average value ± standard deviation (n = 30). Different Latin letters within the same column indicate significant differences among the three density classes in the same grape cultivar (Tukey b test;  $p < 0.05$ ). Different Greek letters within the same row indicate significant differences among grape cultivars at the same density class (Tukey b test;  $p < 0.05$ ).

<sup>c</sup>OIV 235 descriptor code of flesh firmness (1, soft; 2, slightly firm; 3, very firm).

<sup>d</sup>\*, \*\*, \*\*\*, and ns indicate significance at  $p < 0.05$ , 0.01, 0.001, and not significant, respectively.

## Supplemental Data for:

Giacosa, S., F. Torchio, S. Río Segade, M. Giust, D. Tomasi, V. Gerbi, and L. Rolle. 2014.

Selection of a mechanical property for flesh firmness of table grapes in accordance with OIV ampelographic descriptor.

Am. J. Enol. Vitic. 65:206-214. doi: 10.5344/ajev.2014.13115.

**Supplemental Table 3** Peeled berry cutting parameters normalized by berry cutting surface (one side) of densimetrically sorted berries at harvest.

| Parameter normalized by berry cut surface (one side) | Density class <sup>a</sup> | Cultivar (OIV 235 descriptor group) <sup>b,c</sup> |                   |                         |                       |                 | Signf <sup>d</sup> |
|------------------------------------------------------|----------------------------|----------------------------------------------------|-------------------|-------------------------|-----------------------|-----------------|--------------------|
|                                                      |                            | Perle von Csaba (1)                                | Italia (2)        | Dattier de Beyrouth (2) | Superior Seedless (3) | Sultanina (3)   |                    |
| F <sub>1</sub> (N/cm <sup>2</sup> )                  | A                          | 1.403 ± 0.677β                                     | 0.733 ± 0.274a,α  | 1.250 ± 0.447β          | 1.946 ± 0.860γ        | 1.454 ± 0.414β  | ***                |
|                                                      | B                          | 1.861 ± 0.975γ                                     | 0.964 ± 0.455ab,α | 1.334 ± 0.519αβ         | 1.764 ± 0.849β        | 1.420 ± 0.438αβ | **                 |
|                                                      | C                          | 1.845 ± 0.965β                                     | 1.024 ± 0.284b,α  | 1.512 ± 0.525αβ         | 1.876 ± 0.919β        | 1.632 ± 0.471β  | **                 |
|                                                      | Signf <sup>d</sup>         | ns                                                 | *                 | ns                      | ns                    | ns              |                    |
| W <sub>1</sub> (mJ/cm <sup>2</sup> )                 | A                          | 3.349 ± 2.003α                                     | 1.931 ± 1.408α    | 3.154 ± 2.058α          | 6.284 ± 4.859β        | 2.441 ± 1.388α  | ***                |
|                                                      | B                          | 4.411 ± 2.889αβ                                    | 2.103 ± 1.312α    | 3.725 ± 2.064αβ         | 5.238 ± 5.674β        | 2.292 ± 1.330αβ | *                  |
|                                                      | C                          | 3.529 ± 2.341                                      | 2.817 ± 1.403     | 3.850 ± 1.935           | 4.833 ± 4.033         | 3.262 ± 2.277   | ns                 |
|                                                      | Signf <sup>d</sup>         | ns                                                 | ns                | ns                      | ns                    | ns              |                    |
| E <sub>1</sub> (N/(mm cm <sup>2</sup> ))             | A                          | 0.276 ± 0.106a,γ                                   | 0.128 ± 0.027a,α  | 0.216 ± 0.055β          | 0.318 ± 0.094γ        | 0.432 ± 0.114δ  | ***                |
|                                                      | B                          | 0.380 ± 0.169a,βγ                                  | 0.192 ± 0.079b,α  | 0.205 ± 0.076α          | 0.327 ± 0.076β        | 0.438 ± 0.073γ  | ***                |
|                                                      | C                          | 0.660 ± 0.370b,δ                                   | 0.168 ± 0.028b,α  | 0.245 ± 0.084αβ         | 0.355 ± 0.088βγ       | 0.440 ± 0.099γ  | ***                |
|                                                      | Signf <sup>d</sup>         | ***                                                | ***               | ns                      | ns                    | ns              |                    |
| F <sub>2</sub> (N/cm <sup>2</sup> )                  | A                          | 1.890 ± 1.018β                                     | 1.312 ± 0.241a,α  | 1.222 ± 0.352a,α        | 1.327 ± 0.893α        | 0.998 ± 0.474α  | ***                |
|                                                      | B                          | 2.173 ± 1.450γ                                     | 1.713 ± 0.487b,β  | 1.416 ± 0.470ab,αβ      | 1.274 ± 0.691αβ       | 0.931 ± 0.450α  | ***                |
|                                                      | C                          | 2.198 ± 1.026β                                     | 1.227 ± 0.383a,α  | 1.514 ± 0.377b,α        | 1.320 ± 1.005α        | 0.915 ± 0.375α  | ***                |
|                                                      | Signf <sup>d</sup>         | ns                                                 | ***               | *                       | ns                    | ns              |                    |
| E <sub>2</sub> (N/(mm cm <sup>2</sup> ))             | A                          | 0.203 ± 0.109a,β                                   | 0.077 ± 0.016a,α  | 0.089 ± 0.031α          | 0.087 ± 0.065α        | 0.088 ± 0.046α  | ***                |
|                                                      | B                          | 0.263 ± 0.161a,β                                   | 0.123 ± 0.039b,α  | 0.103 ± 0.045α          | 0.084 ± 0.052α        | 0.088 ± 0.054α  | ***                |
|                                                      | C                          | 0.432 ± 0.241b,β                                   | 0.084 ± 0.030a,α  | 0.113 ± 0.038α          | 0.097 ± 0.100α        | 0.082 ± 0.036α  | ***                |
|                                                      | Signf <sup>d</sup>         | **                                                 | ***               | ns                      | ns                    | ns              |                    |
| F <sub>max</sub> (N/cm <sup>2</sup> )                | A                          | 1.912 ± 1.037αβ                                    | 1.548 ± 0.308a,α  | 1.659 ± 0.424a,α        | 2.273 ± 0.893β        | 1.593 ± 0.557α  | ***                |
|                                                      | B                          | 2.187 ± 0.854                                      | 1.903 ± 0.490b    | 1.642 ± 0.494a          | 2.153 ± 0.798         | 1.631 ± 0.397   | ns                 |
|                                                      | C                          | 2.337 ± 1.107γ                                     | 1.516 ± 0.418a,α  | 1.947 ± 0.439b,αβγ      | 2.173 ± 0.791βγ       | 1.709 ± 0.459αβ | **                 |
|                                                      | Signf <sup>d</sup>         | ns                                                 | **                | *                       | ns                    | ns              |                    |
| E <sub>max</sub> (N/(mm cm <sup>2</sup> ))           | A                          | 0.289 ± 0.131a,βγ                                  | 0.120 ± 0.032a,α  | 0.182 ± 0.062ab,α       | 0.253 ± 0.108β        | 0.349 ± 0.146γ  | ***                |
|                                                      | B                          | 0.332 ± 0.153a,β                                   | 0.188 ± 0.083b,α  | 0.166 ± 0.066a,α        | 0.224 ± 0.089α        | 0.333 ± 0.103β  | ***                |
|                                                      | C                          | 0.535 ± 0.315b,δ                                   | 0.132 ± 0.046a,α  | 0.221 ± 0.095b,αβ       | 0.273 ± 0.116βγ       | 0.381 ± 0.138γ  | ***                |
|                                                      | Signf <sup>d</sup>         | **                                                 | ***               | *                       | ns                    | ns              |                    |

<sup>a</sup>Density class: A, 1075 kg/m<sup>3</sup>; B, 1081 kg/m<sup>3</sup>; C, 1088 kg/m<sup>3</sup>.

<sup>b</sup>All data are expressed as average value ± standard deviation (n = 30). Different Latin letters within the same column indicate significant differences among the three density classes in the same grape cultivar (Tukey b test; *p* < 0.05). Different Greek letters within the same row indicate significant differences among grape cultivars at the same density class (Tukey b test; *p* < 0.05).

<sup>c</sup>OIV 235 descriptor code of flesh firmness (1, soft; 2, slightly firm; 3, very firm).

<sup>d</sup>\*, \*\*, \*\*\*, and ns indicate significance at *p* < 0.05, 0.01, 0.001, and not significant, respectively.
